# Correction

## Correction: Automated Characterization and Parameter-Free Classification of Cell Tracks Based on Local Migration Behavior

The PLOS ONE Staff

In the Methods section, Equations 10 and 11 are missing due to a typesetting error. The publisher apologizes for this error. The equations can be found in the correct context below:

“where we assume without loss of generality that  $1 \leq m \leq n \leq N_i$ . The track length between time points  $m$  and  $n+1$  can be represented as

$$l_i(n,m) = \sum_{k=m}^{n+1} |\vec{d}_i(k,k)| \quad (10)$$

in terms of the displacement vector  $\vec{d}_i(k,k)$  that refers to subsequent time points  $k$  and  $k+1$ . The staggered confinement ratio is then defined as the ratio of these two quantities,

$$C_i(n,m) = \frac{|\vec{d}_i(n,m)|}{l_i(n,m)}. \quad (11)$$

Viewing  $C_i(n,m)$  as entries of the  $N_i \times N_i$  matrix  $C_i$ , we note that this matrix is symmetric because both the displacement vector  $|\vec{d}(m,n)| = |-\vec{d}(n,m)| = |\vec{d}(n,m)|$  and the track-segment length  $l(n,m) = l(m,n)$  are invariant under the time reversal operation  $n \leftrightarrow m$  such that  $C(n,m) = C(m,n)$ . Furthermore, the diagonal elements of  $C_i$  take values  $C_i(k,k) = 1$  because  $|\vec{d}_i(k,k)| = l_i(k,k)$  for all  $k$ . In general,  $0 \leq C_i(n,m) \leq 1$ , since”

### Reference

1. Mokhtari Z, Mech F, Zitzmann C, Hasenberg M, Gunzer M, et al. (2013) Automated Characterization and Parameter-Free Classification of Cell Tracks Based on Local Migration Behavior. PLoS ONE 8(12): e80808. doi:10.1371/journal.pone.0080808

**Citation:** The PLOS ONE Staff (2014) Correction: Automated Characterization and Parameter-Free Classification of Cell Tracks Based on Local Migration Behavior. PLoS ONE 9(12): e115158. doi:10.1371/journal.pone.0115158

**Published:** December 4, 2014

**Copyright:** © 2014 The PLOS ONE Staff. This is an open-access article distributed under the terms of the Creative Commons Attribution License, which permits unrestricted use, distribution, and reproduction in any medium, provided the original author and source are credited.
